# Supplementary material
Source: MDPI journal article supplement (https://www.mdpi.com/2411-5150/7/3/59)
Supplement: s1 [file s1]

Supplemental Table S1. Demographics, clinical features, pre– and postoperative observations of clinical cases having undergone study procedure as glaucoma component in combined surgery for coexisting pathology.

| Case | Age | Sex | Eye | Diagnosis | Baseline and postoperative observations |               |             |    |                                    |                       |      |    |   |                 |      |    |    |    | Follow-up (m) | Outcome |
|------|-----|-----|-----|-----------|-----------------------------------------|---------------|-------------|----|------------------------------------|-----------------------|------|----|---|-----------------|------|----|----|----|---------------|---------|
|      |     |     |     |           |                                         | BCVA (logMAR) | IOP (mm Hg) | GM | Laser trabeculotomy                | Slit-lamp examination |      |    |   | OCT examination |      |    |    |    |               |         |
|      |     |     |     |           |                                         |               |             |    |                                    | Bleb                  | CLVs |    |   | Bleb            | CLVs |    |    |    |               |         |
|      |     |     |     |           | SNQ                                     | STQ           | SS          |    | SNQ                                |                       | STQ  | SS |   |                 |      |    |    |    |               |         |
| 1    | 78  | F   | Rt  | AG, IMC   | Baseline                                | 0.1           | 27          | 4  |                                    |                       |      |    |   |                 |      |    |    | 32 |               |         |
|      |     |     |     |           | Postoperative                           |               |             |    | Yes, 1 time (21 <sup>st</sup> day) |                       |      |    |   |                 |      |    |    |    |               |         |
|      |     |     |     |           | 1 w                                     | 0             | 13          | 0  |                                    | -                     | +    | -  | - | -               | NP   | NP | NP |    | Success       |         |
|      |     |     |     |           | 1 m                                     | 0             | 13          | 0  |                                    | -                     | +    | +  | - | -               | +    | +  | -  |    | Success       |         |
|      |     |     |     |           | 3 m                                     | 0             | 9           | 0  |                                    | -                     | +    | +  | - | -               | +    | +  | -  |    | Success       |         |
|      |     |     |     |           | 6 m                                     | 0.1           | 11          | 0  |                                    | -                     | +    | -  | - | -               | +    | -  | -  |    | Success       |         |
|      |     |     |     |           | 12 m                                    | 0.05          | 11          | 0  |                                    | -                     | +    | -  | - | -               | +    | +  | +  |    | Success       |         |
|      |     |     |     |           | 18 m                                    | 0             | 15          | 0  |                                    | -                     | +    | -  | - | -               | +    | +  | -  |    | Success       |         |
|      |     |     |     |           | 24 m                                    | 0             | 15          | 0  |                                    | -                     | +    | -  | - | -               | +    | -  | -  |    | Success       |         |
|      |     |     | Lt  | AG, IMC   | Baseline                                | 0.1           | 27          | 3  |                                    |                       |      |    |   |                 |      |    |    |    |               |         |
|      |     |     |     |           | Postoperative                           |               |             |    | Yes, 1 time (13 <sup>th</sup> day) |                       |      |    |   |                 |      |    |    | 27 |               |         |
|      |     |     |     |           | 1 w                                     | 0.15          | 6           | 0  |                                    | -                     | -    | -  | - | -               | -    | +  | -  |    | Success       |         |
|      |     |     |     |           | 1 m                                     | 0.15          | 10          | 0  |                                    | -                     | -    | -  | - | -               | -    | +  | +  |    | Success       |         |
|      |     |     |     |           | 3 m                                     | 0.15          | 10          | 0  |                                    | -                     | -    | -  | - | -               | -    | -  | -  |    | Success       |         |
|      |     |     |     |           | 6 m                                     | 0.2           | 15          | 0  |                                    | -                     | -    | -  | - | -               | -    | +  | -  |    | Success       |         |
|      |     |     |     |           | 12 m                                    | 0             | 15          | 0  |                                    | -                     | -    | -  | - | -               | -    | -  | -  |    | Success       |         |
|      |     |     |     |           | 18 m                                    | 0             | 10          | 0  |                                    | -                     | -    | -  | - | -               | -    | -  | -  |    | Success       |         |
|      |     |     |     |           | 24 m                                    | 0             | 10          | 0  |                                    | -                     | -    | -  | - | -               | -    | -  | -  |    | Success       |         |
|      |     |     |     |           |                                         |               |             |    |                                    |                       |      |    |   |                 |      |    |    |    |               |         |
| 2    | 80  | M   | Lt  | AG, IMC   | Baseline                                | 0.4           | 31          | 2  |                                    |                       |      |    |   |                 |      |    |    | 12 |               |         |
|      |     |     |     |           | Postoperative                           |               |             |    | No                                 |                       |      |    |   |                 |      |    |    |    | Success       |         |
|      |     |     |     |           | 1 w                                     | 0             | 10          | 1  |                                    | -                     | -    | -  | - | -               | NP   | NP | NP |    | Success       |         |
|      |     |     |     |           | 1 m                                     | 0             | 14          | 0  |                                    | -                     | -    | +  | - | -               | +    | +  | +  |    | Success       |         |
|      |     |     |     |           | 3 m                                     | 0             | 10          | 0  |                                    | -                     | -    | +  | - | -               | NP   | NP | NP |    | Success       |         |
|      |     |     |     |           | 6 m                                     | 0             | 10          | 0  |                                    | -                     | -    | +  | - | -               | NP   | NP | NP |    | Success       |         |
|      |     |     |     |           | 12 m                                    | 0             | 10          | 0  |                                    | -                     | +    | -  | - | -               | +    | -  | +  |    | Success       |         |
|      |     |     |     |           |                                         |               |             |    |                                    |                       |      |    |   |                 |      |    |    |    |               |         |

|   |    |   |    |                |               |      |      |   |                                                                                                                  |   |   |   |   |   |   |   |   |    |         |
|---|----|---|----|----------------|---------------|------|------|---|------------------------------------------------------------------------------------------------------------------|---|---|---|---|---|---|---|---|----|---------|
| 3 | 69 | F | Lt | AG, HC,<br>ERM | Baseline      | 1    | 30   | 3 |                                                                                                                  |   |   |   |   |   |   |   |   | 15 |         |
|   |    |   |    |                | Postoperative |      |      |   | Yes (4 times)<br>12 <sup>th</sup> day, 19 <sup>th</sup><br>day, 24 <sup>th</sup> day<br>and 80 <sup>th</sup> day |   |   |   |   |   |   |   |   |    |         |
|   |    |   |    |                | 1 w           | 0.2  | 24   | 2 |                                                                                                                  | - | - | + | + | - | - | + | + |    | Failure |
|   |    |   |    |                | 1 m           | 0.05 | 10   | 0 |                                                                                                                  | - | - | + | - | - | - | + | + |    | Success |
|   |    |   |    |                | 3 m           | 0.05 | 23.5 | 0 |                                                                                                                  | - | - | - | - | - | - | - | - |    | Failure |
|   |    |   |    |                | 6 m           | 0.05 | 34   | 3 |                                                                                                                  | - | - | - | - | - | - | - | - |    | Failure |
|   |    |   |    |                | 12 m          | 0.15 | 24   | 3 |                                                                                                                  | - | - | - | - | - | + | + | + |    | Failure |

BCVA indicates best-corrected visual acuity; IMC, immature cataract, HM, hyper mature cataract; ERM, epiretinal membrane; AG, advanced stage glaucoma; IOP, intraocular pressure; GM, glaucoma medications (number of classes); CLVs, conjunctival lymphatic vessels; OCT, optical coherence tomography; SNQ, superior nasal quadrant; STQ, superior temporal quadrant; SS, surgery site; m, months; w, week; NP, examination not performed.
